# Supplementary material for: CLARITY reveals dynamics of ovarian follicular architecture and vasculature in three-dimensions
Source: PubMed Central journal article supplement (PMC5363086; doi:10.1038/srep44810), 2017-03-23
Supplement: srep44810-s1.pdf [file srep44810-s1.pdf]

# **CLARITY reveals dynamics of ovarian follicular architecture and vasculature in three-dimensions**

Yi Feng, Peng Cui, Xiaowei Lu, Brian Hsueh, Fredrik Möller Billig, Livia Zarnescu Yanez, Raju Tomer, Derek Boerboom, Peter Carmeliet, Karl Deisseroth, and Aaron J. W. Hsueh

SUPPLEMENTARY MATERIALS

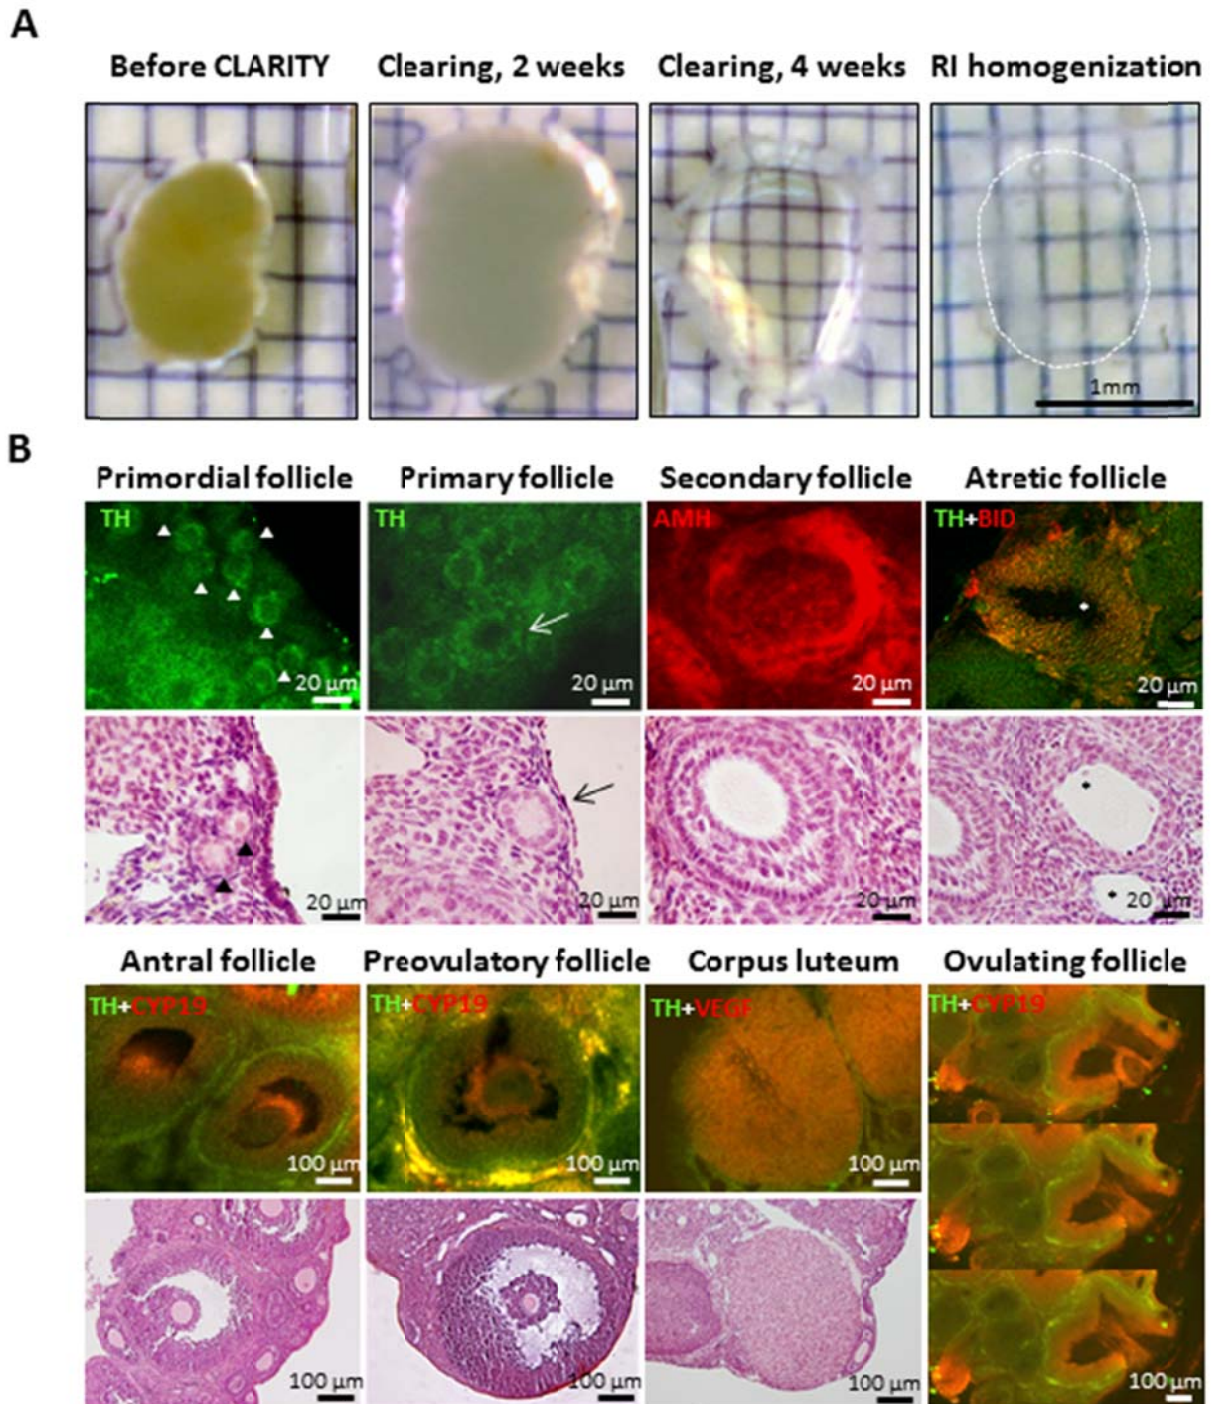

**Figure S1. Identification of ovarian follicles and corpora lutea at different developmental stages using specific markers.** (A) Processing of an ovary using CLARITY. An ovary from an adult proestrous mouse was processed using the CLARITY method, followed by incubation in the clearing buffer for 4 weeks before immunostaining. After staining, samples were incubated

for 1h at 37°C in the FocusClear medium for reflective index (RI) homogenization. Although initial clearing led to tissue shrinkage, subsequent RI homogenization restored the original size. **(B)** Staining of follicles at different stages using specific markers (upper panels) together with histological pictures using hematoxylin and eosin staining (lower panels). Pictures for primordial, primary, and secondary follicles were from ovaries of day 10 mice whereas those for antral, preovulatory, and rupturing follicles together with corpus luteum were from adult proestrous mice. Atretic follicles were from ovaries of immature mice following gonadotropin treatment and then withdrawal. “Ovulating follicle” denotes serial sections of a follicle during rupture. TH, tyrosine hydroxylase; AMH, anti-Müllerian hormone; BID, BH3-interacting domain death agonist; CYP19, aromatase; VEGF, vascular endothelial growth factor. Arrows and arrowheads denote individual follicles whereas asterisks indicate follicle antrum.

A

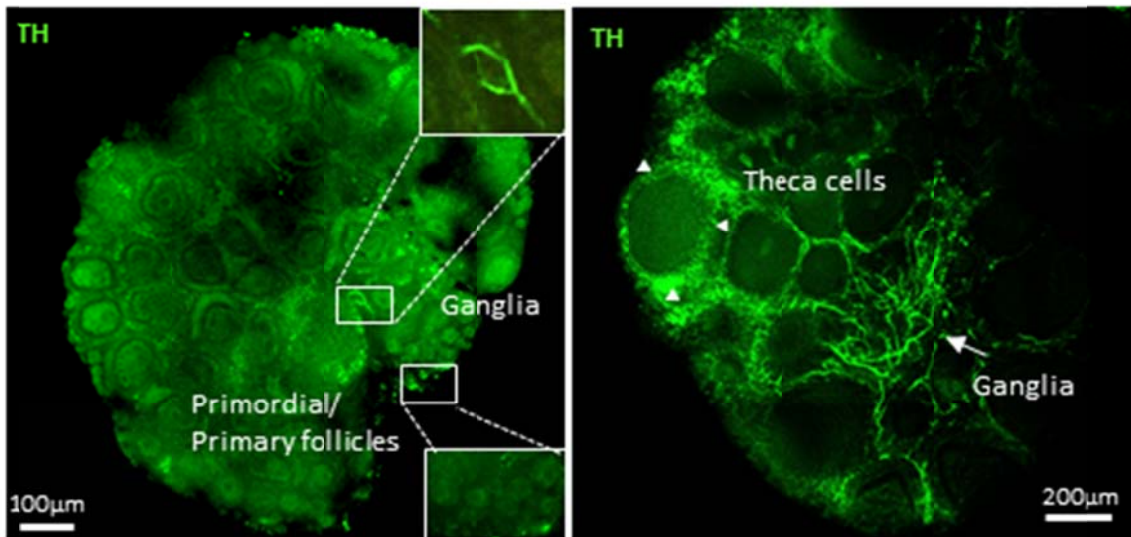

B

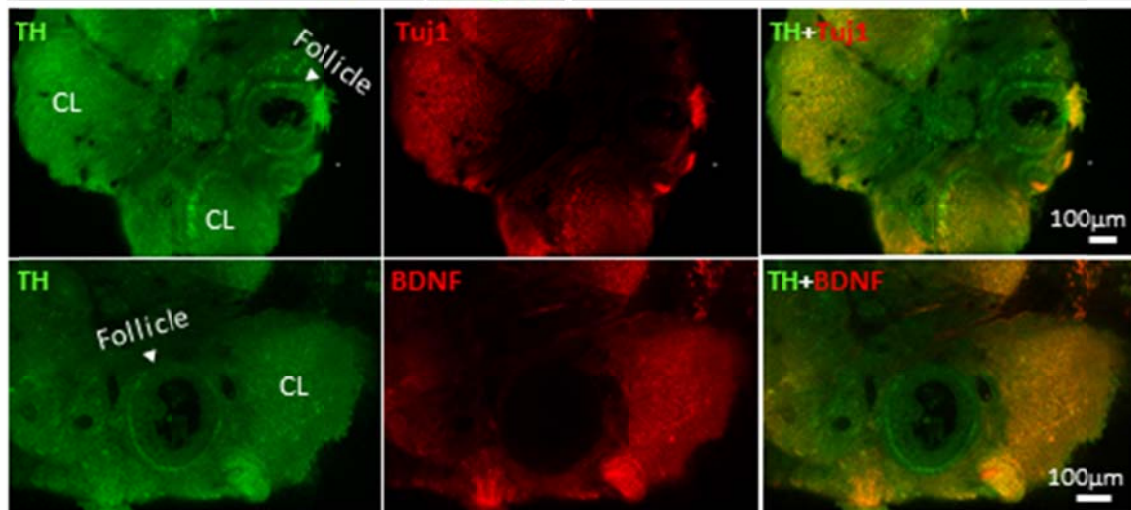

**Figure S2. Ovarian staining in theca cells, ganglia, and corpora lutea (CL) using tyrosine hydroxylase (TH) antibodies.** Ovaries from day 10 (A right panel) and adult mice (A right panel and B) were used for Clarity processing and immunostaining for TH, neuron-specific class III beta-tubulin (Tuj1), and brain-derived neurotropic factor (BDNF). TH staining was evident in theca layer surrounding secondary follicles, ganglia, and CL. Co-staining for TH and Tuj1 or BDNF was found in theca cells and CL. Note nonspecific background staining of TH in all follicles.

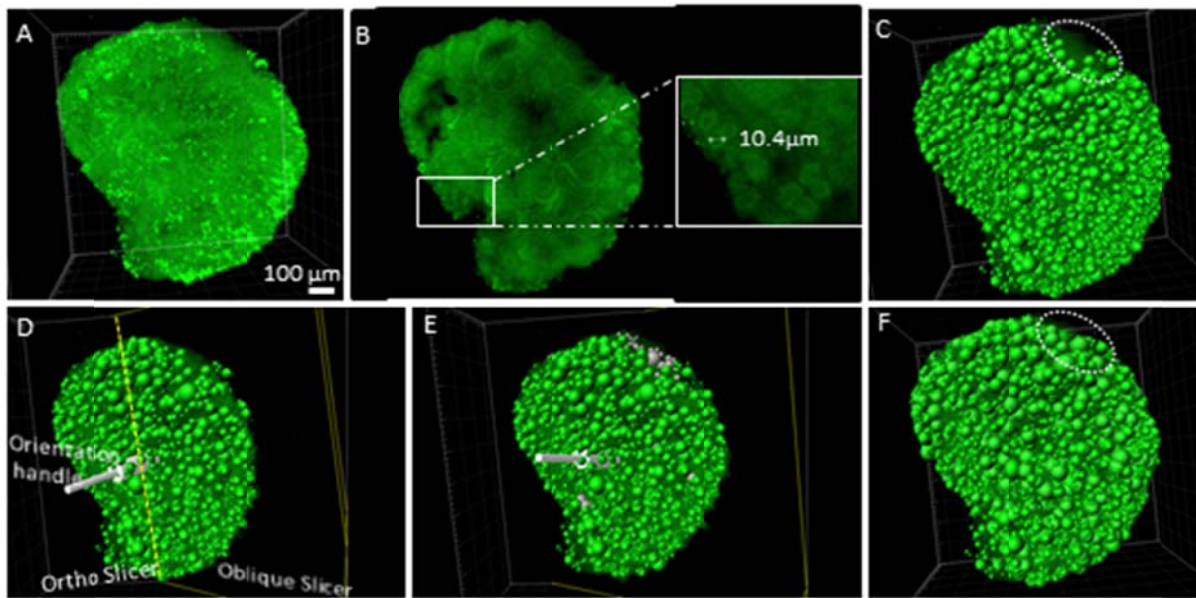

**Figure S3. Spot identification and manual improvement.** Follicle numbers were calculated using Imaris analysis following Clarity and immunostaining for tyrosine hydroxylase. (A) 3D imaging was obtained using confocal microscope after adjusting optimal channel display. (B) The Slice function in Imaris was used to look through each frame of the entire ovary and estimate minimal diameters of follicles. The boxed area was amplified to indicate small follicles at 10.4  $\mu\text{m}$  diameter. (C) Spot automatic algorithm in Imaris was used to calculate follicular volumes by checking for spot sizes, designating source channels, estimating diameters ( $>10.4 \mu\text{m}$ ) and subtracting background noises, followed by adjustment of quality parameters and spot regions of interest. Accuracy of spot determination depended on the quality of staining and image resolution. The dotted circle shows missing spots due to low signals. (D) The Oblique Slicer and Ortho Slicer functions in Imaris were used to manually improve spot signals. (E) Slice position and Slice orientation (XY, XZ, and YZ planes) were used to check accuracy for individual follicle prediction. Software could suggest adding/deleting spots. (F) Merging all spots together allows determination of follicle numbers, diameters, volumes and positions. The dotted circle shows amended spots.



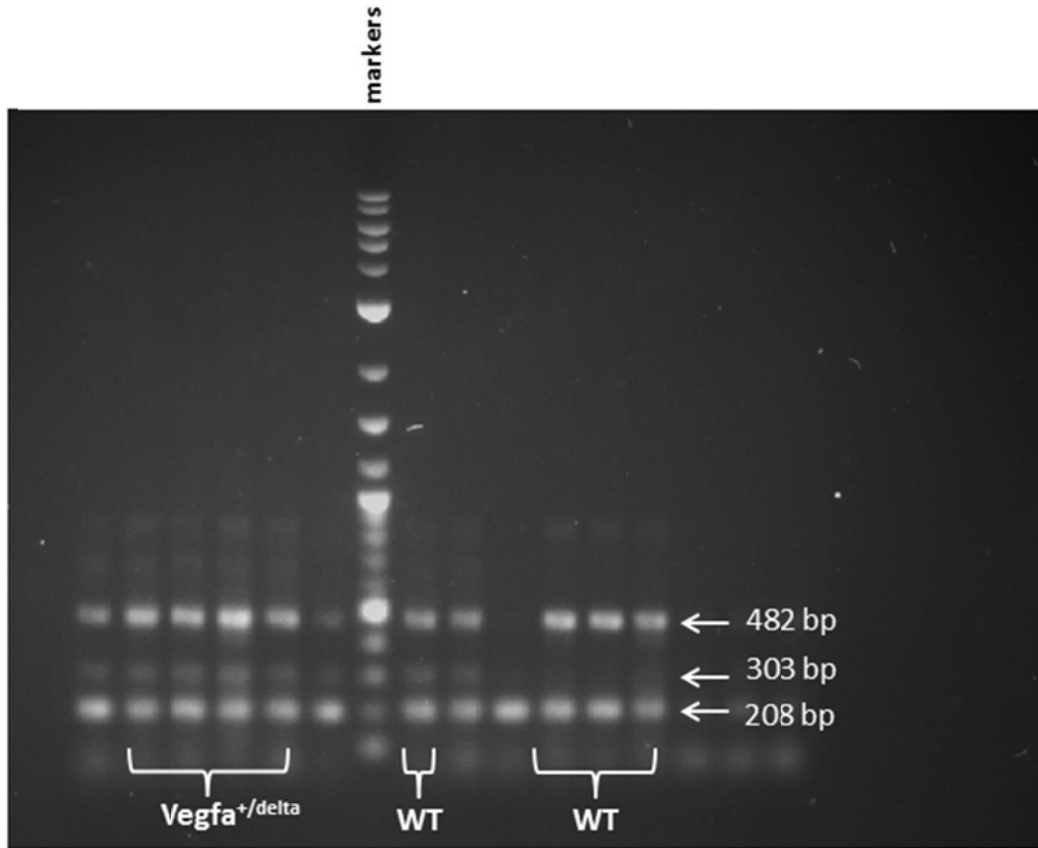

**Figure S4. Full-length gel related to the cropped gel of Figure 6A.** Wild type and heterozygous mutant *Vegfa*<sup>+/-delta</sup> mice with deletion of the hypoxia-response element in the VEGFA gene promoter were genotyped based on PCR analyses of tail DNA.

## **Movies**

**Movie S1.** Three-dimensional images of a day-10 mouse ovary were generated for Spot transformation, followed by manual improvement, to identify all follicles.

**Movie S2.** Construction of follicle relationship maps using specific markers in ovary of an adult proestrous mouse. Follicles at all developmental stages were traced together with corpora lutea in the ovary.

**Movie S3.** Relationship of blood vessels and antral/preovulatory follicles after equine chorionic gonadotropin (eCG) stimulation.

**Movie S4.** Corpora lutea and vasculature networks in mice ovaries treated with human chorionic gonadotropin (hCG) and equine chorionic gonadotropin (eCG) for different duration. PECAM1, platelet-endothelial cell adhesion molecule 1; TH, tyrosine hydroxylase.

**Movie S5.** Ovarian vasculature surrounding follicles in an ovary at 24h after equine chorionic gonadotropin (eCG) treatment. PECAM1, platelet-endothelial cell adhesion molecule 1; TH, tyrosine hydroxylase.

**Table S1. Parameters (diameter, surface area, and volume) for follicles, oocytes, and corpora lutea at different developmental stages in mice.**

| Ovarian structure     | Diameter ( $\mu\text{m}$ ) | Surface area ( $\mu\text{m}^2$ ) | Volume ( $\mu\text{m}^3$ ) |
|-----------------------|----------------------------|----------------------------------|----------------------------|
| Follicle              |                            |                                  |                            |
| Primordial            | 7-25                       | 154-1,963                        | 180-8,181                  |
| Primary               | 25-55                      | 1,963-9,503                      | 8,181-87,114               |
| Secondary             | 50-250                     | $0.078-2 \times 10^5$            | $0.65-82 \times 10^5$      |
| Antral                | 200-350                    | $1-4 \times 10^5$                | $42-225 \times 10^5$       |
| Preovulatory          | 350-600                    | $9-11 \times 10^5$               | $449-626 \times 10^5$      |
| Oocyte                |                            |                                  |                            |
| Primordial follicle   | 4-6                        | 50-113                           | 34-113                     |
| Primary follicle      | 8-30                       | 200-380                          | 268-697                    |
| Secondary follicle    | 13-65                      | 531-13,273                       | $0.01-1.4 \times 10^5$     |
| Antral follicle       | 80-120                     | 20,106-45,239                    | $2.7-9 \times 10^5$        |
| Preovulatory follicle | 85-180                     | $0.23-1 \times 10^5$             | $3-30 \times 10^5$         |
| Corpus luteum         | 250-850                    | $2-59 \times 10^5$               | $70-5,093 \times 10^5$     |



**Table S2. Fold changes of different parameters for follicles at different developmental stages in mice.**

| Ovarian structure     | Diameter ( $\mu\text{m}$ ) | Surface area ( $\mu\text{m}^2$ ) | Volume ( $\mu\text{m}^3$ ) |
|-----------------------|----------------------------|----------------------------------|----------------------------|
| Primordial follicle   | 3.6                        | 12.75                            | 45.00                      |
| primary follicle      | 2.2                        | 4.84                             | 10.65                      |
| Secondary follicle    | 5                          | 25.00                            | 125.00                     |
| Antral follicle       | 1.75                       | 3.00                             | 5.36                       |
| Preovulatory follicle | 1.71                       | 1.27                             | 1.39                       |
| Corpus luteum         | 3.4                        | 28.00                            | 73.09                      |

**Table S3. Antibodies information.**

| Antibodies                                             | Species           | Dilution | Company           | Cat. No   | Markers for                                       |
|--------------------------------------------------------|-------------------|----------|-------------------|-----------|---------------------------------------------------|
| Primary antibodies                                     |                   |          |                   |           |                                                   |
| TH (tyrosine hydroxylase)                              | Rabbit            | 1:50     | Abcam             | ab112     | Neurons                                           |
| TH (tyrosine hydroxylase)                              | Chicken           | 1:50     | Abcam             | ab76442   | Neurons                                           |
| Tuj1 (neuron-specific class III beta-tubulin)          | Rabbit            | 1:50     | Abcam             | ab18207   | Neurons                                           |
| BDNF (brain-derived neurotropic factor)                | Rabbit            | 1:50     | Abcam             | ab72439   | Neurons                                           |
| PECAM1 (platelet-endothelial cell adhesion molecule 1) | Rabbit            | 1:10     | Abcam             | ab28364   | Blood vessel (endothelium cells)/corpus luteum    |
| AMH ( anti-Müllerian hormone)                          | Goat              | 1:50     | Santa Cruz        | sc-6886   | Granulosa cell (secondary follicle)               |
| CYP19 (aromatase)                                      | Rabbit            | 1:50     | Abcam             | ab35604   | Granulosa cell (antral and preovulatory follicle) |
| Bid (BH interacting domain death agonist)              | Goat              | 1:25     | Santa Cruz        | sc-292494 | Granulosa cell (atretic follicle)                 |
| VEGF (vascular endothelial growth factor)              | Rabbit            | 1:50     | Abcam             | ab46154   | Corpus luteum                                     |
| Secondary antibodies                                   |                   |          |                   |           |                                                   |
| Alexa Flour 488                                        | Donkey anti goat  | 1:50     | Life Technologies | A11055    |                                                   |
| Alexa Flour 488                                        | Goat anti rabbit  | 1:50     | Life Technologies | A11008    |                                                   |
| Alexa Flour 488                                        | Goat anti chicken | 1:50     | Life Technologies | A11039    |                                                   |
| Alexa Flour 594                                        | Goat anti rabbit  | 1:50     | Life Technologies | A11012    |                                                   |
| Alexa Flour 594                                        | Donkey anti goat  | 1:50     | Life Technologies | A11058    |                                                   |
| Alexa Flour 594                                        | Goat anti chicken | 1:50     | Life Technologies | A11042    |                                                   |
